# Supplementary material for: Administration of an Acidic Sphingomyelinase (ASMase) Inhibitor, Imipramine, Reduces Hypoglycemia-Induced Hippocampal Neuronal Death
Source: MDPI journal article supplement (doi:10.3390/cells11040667), 2022-02-14
Supplement: s1 [file s1]

## Supplementary Figure S1.

|            | pmol/mg protein |       |       |        |       |       |       |        |        |       |       |
|------------|-----------------|-------|-------|--------|-------|-------|-------|--------|--------|-------|-------|
|            | C14             | C16   | C18:1 | C18    | C20:1 | C20   | C22   | C24:1  | C24    | C26:1 | C26   |
| Sham-Veh_1 | 6.01            | 45.06 | 19.60 | 707.19 | 9.01  | 69.65 | 46.44 | 416.89 | 134.00 | 38.41 | 22.38 |
| Sham-Veh_2 | 6.27            | 35.62 | 17.32 | 811.30 | 7.55  | 45.92 | 30.14 | 327.12 | 92.60  | 32.18 | 16.81 |
| Sham-Veh_3 | 6.57            | 53.15 | 23.03 | 748.05 | 10.94 | 81.22 | 60.79 | 548.64 | 178.37 | 48.92 | 23.52 |
| Ave.       | 6.29            | 44.61 | 19.98 | 755.51 | 9.17  | 65.60 | 45.79 | 430.88 | 134.99 | 39.84 | 20.90 |
| S.D.       | 0.28            | 8.77  | 2.88  | 52.45  | 1.70  | 18.00 | 15.34 | 111.42 | 42.89  | 8.46  | 3.59  |
| S.E.       | 0.16            | 5.06  | 1.65  | 30.28  | 0.98  | 10.38 | 8.85  | 64.32  | 24.7   | 4.88  | 2.07  |
| Sham-IMP_1 | 4.98            | 35.90 | 18.51 | 649.34 | 9.32  | 63.58 | 45.70 | 407.16 | 127.84 | 38.76 | 19.54 |
| Sham-IMP_2 | 4.95            | 38.98 | 16.16 | 680.76 | 7.69  | 59.49 | 48.02 | 357.73 | 121.02 | 34.70 | 25.40 |
| Sham-IMP_3 | 5.10            | 42.49 | 17.70 | 574.38 | 7.85  | 58.38 | 46.58 | 368.06 | 133.59 | 33.70 | 21.89 |
| Ave.       | 5.01            | 39.12 | 17.46 | 634.82 | 8.29  | 60.48 | 46.77 | 377.65 | 127.48 | 35.72 | 22.27 |
| S.D.       | 0.08            | 3.30  | 1.20  | 54.66  | 0.90  | 2.74  | 1.17  | 26.07  | 6.30   | 2.68  | 2.95  |
| S.E.       | 0.05            | 1.90  | 0.68  | 31.55  | 0.51  | 1.58  | 0.67  | 15.05  | 3.63   | 1.54  | 1.70  |
| HG-Veh_1   | 8.38            | 62.25 | 24.94 | 858.74 | 10.29 | 80.89 | 62.12 | 567.91 | 190.63 | 52.28 | 26.02 |
| HG-Veh_2   | 8.94            | 65.02 | 24.54 | 990.03 | 10.31 | 90.86 | 67.26 | 587.67 | 211.86 | 53.36 | 26.65 |
| HG-Veh_3   | 8.39            | 64.92 | 22.78 | 853.24 | 11.40 | 84.33 | 57.39 | 552.30 | 200.97 | 54.56 | 29.64 |
| HG-Veh_4   | 7.62            | 84.12 | 28.85 | 883.07 | 10.27 | 86.57 | 85.18 | 583.17 | 203.04 | 51.20 | 22.46 |
| HG-Veh_5   | 8.62            | 65.46 | 23.76 | 890.30 | 10.83 | 91.31 | 62.79 | 675.29 | 198.26 | 44.35 | 28.29 |
| HG-Veh_6   | 10.51           | 77.55 | 25.71 | 919.50 | 12.41 | 79.25 | 75.21 | 498.52 | 231.51 | 61.85 | 34.15 |
| Ave.       | 8.74            | 69.88 | 25.09 | 899.15 | 10.91 | 85.53 | 68.32 | 577.48 | 206.04 | 52.93 | 27.86 |
| S.D.       | 0.96            | 8.80  | 2.09  | 50.49  | 0.85  | 5.00  | 10.21 | 57.72  | 14.24  | 5.64  | 3.92  |
| S.E.       | 0.39            | 3.59  | 0.85  | 20.61  | 0.34  | 2.04  | 4.16  | 23.56  | 5.81   | 2.30  | 1.60  |
| HG-IMP_1   | 6.35            | 45.68 | 19.41 | 660.87 | 7.78  | 58.83 | 43.47 | 378.16 | 133.22 | 34.88 | 20.03 |
| HG-IMP_2   | 8.47            | 64.78 | 23.23 | 815.31 | 9.88  | 81.52 | 60.74 | 475.39 | 181.54 | 44.17 | 27.51 |
| HG-IMP_3   | 5.41            | 40.42 | 18.81 | 621.26 | 11.09 | 64.95 | 51.05 | 457.24 | 155.59 | 46.95 | 28.41 |
| HG-IMP_4   | 6.65            | 48.82 | 19.10 | 543.43 | 9.89  | 70.28 | 59.51 | 433.08 | 179.83 | 49.48 | 44.56 |
| HG-IMP_5   | 7.27            | 52.55 | 23.31 | 645.10 | 9.70  | 50.65 | 62.40 | 530.74 | 158.70 | 39.69 | 23.79 |
| HG-IMP_6   | 5.87            | 44.84 | 16.92 | 527.83 | 10.38 | 88.06 | 45.60 | 429.30 | 199.13 | 48.47 | 22.63 |
| Ave.       | 6.67            | 49.51 | 20.13 | 635.63 | 9.78  | 69.04 | 53.79 | 450.65 | 168.00 | 43.94 | 27.82 |
| S.D.       | 1.08            | 8.50  | 2.58  | 103.28 | 1.10  | 13.98 | 8.20  | 51.16  | 23.42  | 5.66  | 8.76  |
| S.E.       | 0.44            | 3.47  | 1.05  | 42.16  | 0.45  | 5.71  | 3.34  | 20.88  | 9.56   | 2.31  | 3.58  |

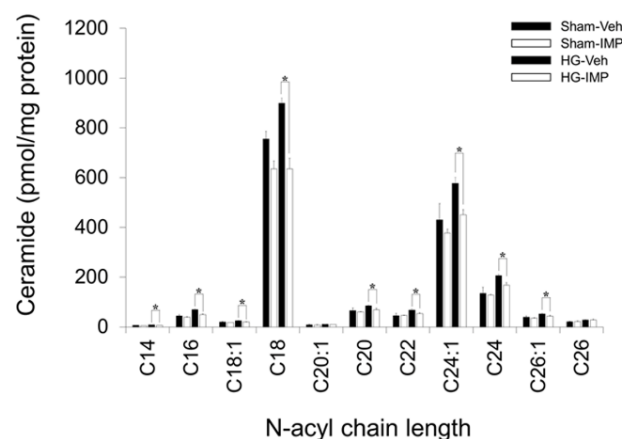

**Figure S1.** An analysis of 11 species of ceramide contents following N-acetyl chain length: (A) an analysis of 11 ceramide species found in common neurological diseases showed that all types of ceramide increased in the hippocampus after hypoglycemia. In particular, C18 and C24:1 remained at high concentrations under normal conditions, and both types were found to be remarkably increased in the hypoglycemia-vehicle group. On the other hand, in the imipramine-treated group after injury, all 11 ceramides were reduced and both C18 and C24:1 were significantly reduced, after having been excessively increased due to hypoglycemia. (B) The bar graph represents an analysis of 11 types of ceramide contents following N-acetyl chain length in the hippocampus. Data are mean  $\pm$  S.E.M.,  $n = 3$  for each sham group.  $N = 6$  for each hypoglycemia group. \* Significantly different from the vehicle-treated group at  $p < 0.05$ .

**Supplementary Table S1. Physiological parameters of animals**

| <b>A</b>             |                     |                     |                                                 | <b>B</b>         |           |                     |           |
|----------------------|---------------------|---------------------|-------------------------------------------------|------------------|-----------|---------------------|-----------|
| Glucose level (mM/L) | Before              | During hypoglycemia | After                                           | Temperature (°C) | Before    | During hypoglycemia | After     |
| Sham-Veh             | 5-6                 | -                   | -                                               | Sham-Veh         | 36.5-37.0 | -                   | -         |
| Sham-IMP             | 5-6                 | -                   | -                                               | Sham-IMP         | 36.5-37.0 | -                   | -         |
| HG-Veh               | 3-4 (after fasting) | < 1                 | Recovery normal blood glucose level (5-6mmol/L) | HG-Veh           | 36.5-37.0 | 37.0-37.8           | 36.5~37.0 |
| HG-IMP               | 3-4 (after fasting) | < 1                 | Recovery normal blood glucose level (5-6mmol/L) | HG-IMP           | 36.5-37.0 | 37.0-37.8           | 36.5~37.0 |

  

| <b>C</b>        |         |                     |         | <b>D</b>         |         |                                                               |         |
|-----------------|---------|---------------------|---------|------------------|---------|---------------------------------------------------------------|---------|
| Body Weight (g) | Before  | During hypoglycemia | After   | Heart rate (bpm) | Before  | During hypoglycemia                                           | After   |
| Sham-Veh        | 300-330 | -                   | 330-350 | Sham-Veh         | 330-360 | -                                                             | -       |
| Sham-IMP        | 300-330 | -                   | 330-350 | Sham-IMP         | 330-360 | -                                                             | -       |
| HG-Veh          | 300-330 | 300-330             | 300-330 | HG-Veh           | 330-360 | 330-420 (bradycardia 150-210bpm for approximately 10 seconds) | 330-360 |
| HG-IMP          | 300-330 | 300-330             | 300-330 | HG-IMP           | 330-360 | 330-420 (bradycardia 150-210bpm for approximately 10 seconds) | 330-360 |

  

| <b>E</b>              |        |                     |        |
|-----------------------|--------|---------------------|--------|
| Blood pressure (mmHg) | Before | During hypoglycemia | After  |
| Sham-Veh              | 80-120 | -                   | -      |
| Sham-IMP              | 80-120 | -                   | -      |
| HG-Veh                | 80-120 | 150-230             | 80-120 |
| HG-IMP                | 80-120 | 150-230             | 80-120 |

**Table S1.** Physiological parameters of animals on before hypoglycemia, during hypoglycemia. and after hypoglycemia: (A) blood glucose level (mM/L). (B) Temperature (°C). (C) Body weight (g). (D) Heart rate (bpm). (E) Blood pressure (mmHg). There was no difference between the four groups before and after hypoglycemia on blood glucose level, temperature, blood pressure, and heart rate, except for weight loss due to surgery after hypoglycemia.
